# Supplementary material for: Impact of COVID-19 Restrictions in Childbirth and Puerperium: A Cross-Sectional Study
Source: MDPI journal article supplement (doi:10.3390/healthcare11020249), 2023-01-13
Supplement: s1 [file s1]

**Supplementary Materials**

**Table S1. CVI results from survey**

| Item       | E.1  | E. 2 | E.3 | E.4 | E.5  | E.6 | E.7 | E.8  | E.9  | E.10 | Total                  | Item-<br>CVI |
|------------|------|------|-----|-----|------|-----|-----|------|------|------|------------------------|--------------|
| 1          | 4    | 4    | 4   | 3   | 4    | 4   | 3   | 4    | 4    | 4    | 10                     | 1.00         |
| 2          | 4    | 4    | 4   | 3   | 4    | 4   | 4   | 4    | 4    | 4    | 10                     | 1.00         |
| 3          | 4    | 2    | 4   | 3   | 4    | 4   | 4   | 4    | 4    | 4    | 9                      | 0.9          |
| 6          | 4    | 2    | 4   | 2   | 4    | 3   | 4   | 3    | 4    | 4    | 8                      | 0.8          |
| 7          | 4    | 3    | 2   | 3   | 4    | 2   | 3   | 4    | 4    | 3    | 8                      | 0.8          |
| 8          | 4    | 3    | 4   | 4   | 4    | 4   | 2   | 4    | 4    | 4    | 9                      | 0.9          |
| 9          | 4    | 4    | 4   | 3   | 4    | 4   | 4   | 4    | 4    | 4    | 10                     | 1.00         |
| 10         | 4    | 4    | 4   | 3   | 4    | 4   | 4   | 4    | 4    | 4    | 10                     | 1.00         |
| 11         | 4    | 4    | 2   | 3   | 4    | 2   | 4   | 4    | 4    | 4    | 8                      | 0.8          |
| 12         | 4    | 4    | 4   | 2   | 4    | 3   | 2   | 4    | 4    | 4    | 8                      | 0.8          |
| Total      | 10   | 8    | 8   | 9   | 10   | 8   | 8   | 10   | 10   | 10   | Total-<br>Scale<br>CVI | 0.9          |
| Proportion | 1.00 | 0.8  | 0.9 | 0.9 | 1.00 | 0.8 | 0.8 | 1.00 | 1.00 | 1.00 |                        |              |

Proportion: Proportion of experts giving a value of at least 3 to the item.
